# Supplementary material
Source: MDPI journal article supplement (https://www.mdpi.com/2076-3417/13/2/1050)
Supplement: s1 [file s1]

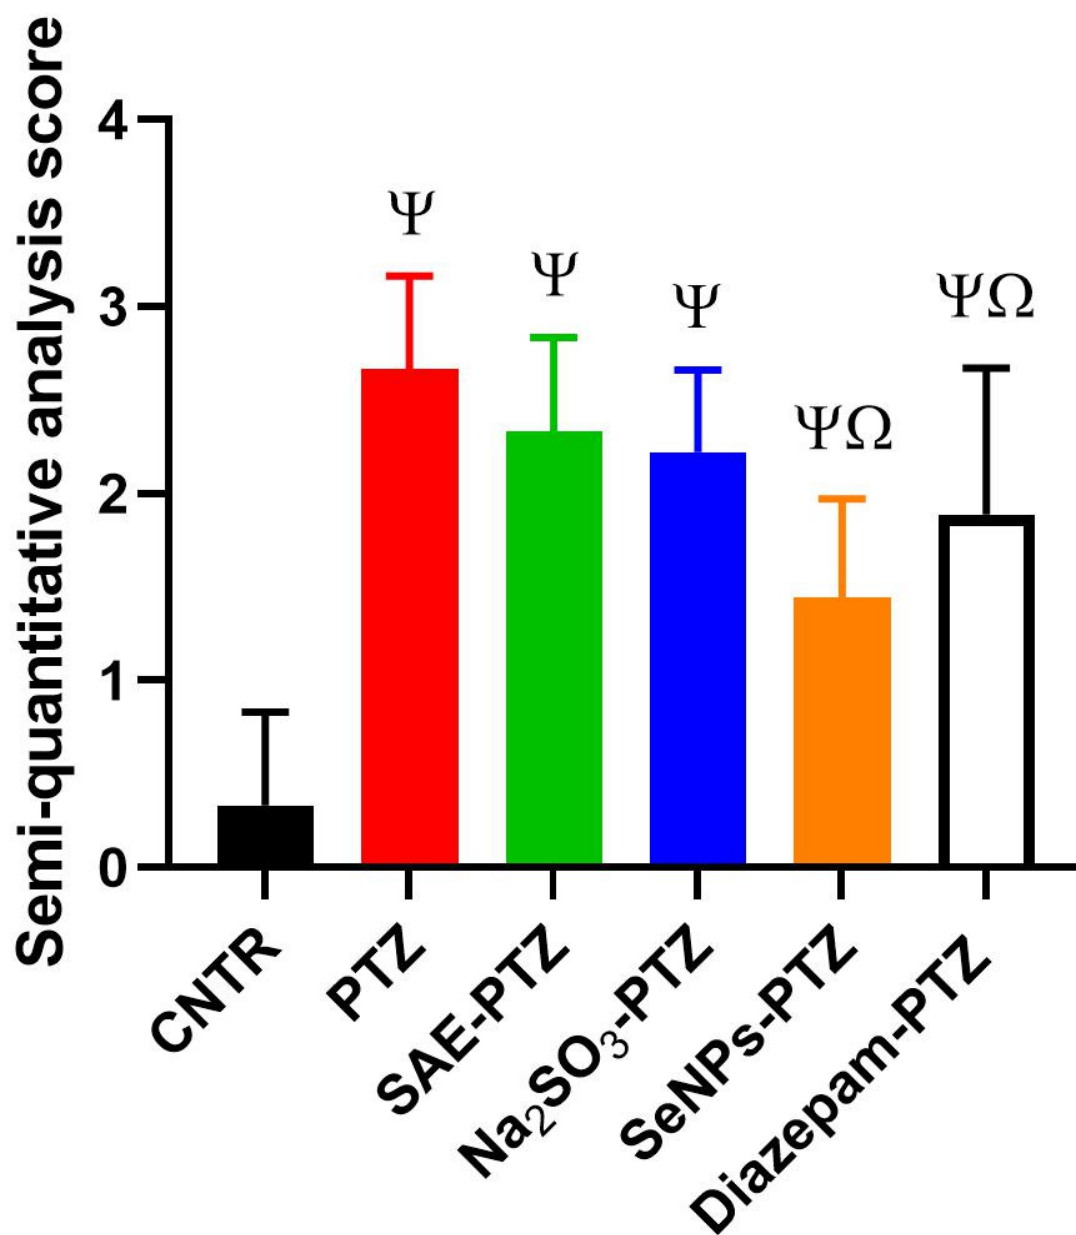

**Supplementary data; Figure S1.** Effects of oral administration of *Syzygium aromaticum* extract (SAE), sodium selenite (Na<sub>2</sub>SeO<sub>3</sub>), and green synthesized SeNPs using SAE (SAE-SeNPs) on semi-quantitative analysis of histopathology of cortical tissue following pentylenetetrazole (PTZ)-induced epileptic seizures. Ψ and Ω indicate significant differences ( $p < 0.05$ ) when compared with the control and PTZ-exposed groups, respectively. All values are presented as the mean ± standard deviation (SD).
